# Supplementary material for: Isotopic evidence of unaccounted for Fe and Cu erythropoietic pathways
Source: Royal Society of Chemistry journal article supplement (doi:10.1039/c1mt00025j), 2011-01-01
Supplement: c1mt00025j.pdf [file c1mt00025j.pdf]

Table A1

SERUM

| sample # | gender | age | group | Na<br>g/L | Mg<br>g/L | K<br>g/L | Ca<br>g/L | Fe<br>g/L | Cu<br>ppb | Zn<br>ppb | $\delta^{66}\text{Zn}$<br>‰ | $\delta^{65}\text{Cu}$<br>‰ | $\delta^{56}\text{Fe}$<br>‰ |
|----------|--------|-----|-------|-----------|-----------|----------|-----------|-----------|-----------|-----------|-----------------------------|-----------------------------|-----------------------------|
| 16843 6  | F      | 32  | A1    | 2095      | 17.3      | 188      | 112       | 1.251     | 1156      | 1206      | 0.12                        | -0.04                       | -1.43                       |
| 16848 7  | F      | 19  | A     | 2149      | 19.3      | 23.0     | 146       | 1.526     | 1586      | 1528      | 0.09                        | -0.71                       | -2.41                       |
| 16849 5  | F      | 20  | O     | 2308      | 17.3      | 33.8     | 126       | 1.436     | 976       | 1477      | 0.09                        | -0.01                       | -2.18                       |
| 16888 2  | F      | 20  | B     | 2444      | 18.4      | 153      | 139       | 0.630     | 2816      | 1530      | 0.12                        | -0.30                       | -2.97                       |
| 16891 1  | F      | 19  | O     | 1753      | 17.8      | 34.9     | 146       | 1.527     | 2271      | 1502      | 0.11                        | -0.22                       | -1.67                       |
| 16892 -  | F      | 19  | O     | 2130      | 15.7      | 124      | 118       | 1.669     | 2271      | 1157      | 0.26                        | -0.15                       | -1.38                       |
| 20164 6  | F      | 21  | A     | 2449      | 17.7      | 117      | 124       | 1.549     | 2165      | 1151      | 0.28                        | -0.18                       | -0.89                       |
| 20165 4  | F      | 20  | O     | 2103      | 18.7      | 10.1     | 92.7      | 2.118     | 896       | 1163      | 0.16                        | 0.04                        | -1.60                       |
| 20166 2  | F      | 20  | B     | 2536      | 15.4      | 105      | 119       | 1.532     | 1927      | 1223      | 0.16                        | -0.05                       | -0.61                       |
| 20266 5  | F      | 20  | A     | 2727      | 17.5      | 128      | 110       | 0.711     | 966       | 1034      | -0.03                       | -0.10                       | -1.38                       |
| 20268 1  | F      | 31  | A     | 3172      | 18.7      | 138      | 88.3      | 1.162     | 973       | 1099      | 0.03                        | -0.01                       | -1.46                       |
| 22458 1  | F      | 22  | O     | 3161      | 21.5      | 158      | 90.2      | 1.897     | 1086      | 1392      | 0.14                        | -0.48                       | -2.55                       |
| 22461 0  | F      | 22  | AB    | 2906      | 19.4      | 122      | 86.1      | 0.853     | 966       | 1431      | 0.27                        | -0.26                       | -0.79                       |
| 22480 5  | F      | 32  | A     | 3060      | 19.1      | 168      | 91.1      | 1.456     | 1634      | 1381      | 0.30                        | -0.26                       | -2.80                       |
| 22495 2  | F      | 34  | A     | 3145      | 19.2      | 163      | 92.2      | 1.408     | 941       | 1153      | 0.21                        | -0.09                       | -1.25                       |
| 22935 8  | F      | 21  | O     | 3049      | 16.2      | 182      | 95.8      | 1.706     | 1547      | 1480      | 0.22                        | -0.44                       | -1.69                       |
| 22936 6  | F      | 19  | O     | 3099      | 20.5      | 164      | 91.3      | 0.814     | 1899      | 1491      | 0.20                        | -0.19                       | -0.84                       |
| 22939 0  | F      | 22  | A1    | 2550      | 20.3      | 116      | 82.6      | 1.386     | 1801      | 1268      | 0.14                        | -0.36                       | -2.00                       |
| 22940 3  | F      | 19  | B     | 2853      | 19.5      | 174      | 95.8      | 1.476     | 1082      | 1066      | 0.11                        | -0.24                       | -1.62                       |
| 22943 8  | F      | 21  | O     | 2538      | 21.1      | 154      | 93.8      | 0.902     | 1216      | 1427      | 0.30                        | -0.30                       | -1.36                       |
| 22946 2  | F      | 20  | A     | 3091      | 21.3      | 244      | 98.9      | 2.138     | 1715      | 1185      | 0.24                        | -0.36                       | -1.16                       |
| 23056 -  | F      | 19  | A     | 3145      | 20.5      | 242      | 109       | 2.463     | 1917      | 1361      | 0.24                        | -0.29                       | -1.85                       |
| 23058 6  | F      | 20  | A     | 3005      | 20.5      | 209      | 93.7      | 1.935     | 1151      | 1495      | 0.13                        | -0.48                       | -1.29                       |
| 23060 7  | F      | 20  | A     | 2770      | 20.2      | 112      | 94.7      | 1.027     | 2135      | 1103      | 0.28                        | -0.43                       | -1.16                       |
| 23062 3  | F      | 21  | O     | 2835      | 20.6      | 232      | 96.5      | 2.284     | 1738      | 1293      | 0.20                        | -0.33                       | -2.05                       |
| 075828 4 | F      | 28  | B     |           |           |          |           |           |           |           | 0.16                        | -0.53                       | -2.56                       |
| 078207 3 | F      | 38  | B     |           |           |          |           |           |           |           | 0.20                        | -0.80                       | -0.41                       |
| 152389 0 | F      | 31  | B     |           |           |          |           |           |           |           | 0.32                        | -0.27                       | -1.82                       |
| 0001935  | M      | 25  | B     | 2984      | 20.9      | 79.0     | 110       | 1.716     | 1210      | 1287      | 0.31                        | -0.44                       | -2.65                       |
| 0001943  | M      | 35  | O     | 2888      | 21.6      | 25.9     | 105       | 1.213     | 815       | 1288      | 0.19                        | -0.61                       | -1.89                       |
| 0175062  | M      | 18  | O     | 2937      | 22.3      | 64.1     | 110       | 0.537     | 701       | 1978      | 0.19                        | -0.48                       | -2.04                       |
| 0175089  | M      | 18  | O     | 3117      | 20.5      | 114      | 112       | 0.806     | 733       | 1004      | 0.25                        | -0.56                       | -1.41                       |
| 0195936  | M      | 35  | B     | 3097      | 21.5      | 154      | 115       | 1.054     | 907       | 1127      | 0.15                        | -0.29                       | -2.00                       |
| 1003406  | M      | 20  | O     | 3026      | 20.8      | 231      | 106       | 1.169     | 675       | 1788      | 0.15                        | -0.64                       | -3.38                       |
| 1003430  | M      | 22  | B     | 2858      | 17.9      | 169      | 92.4      | 1.697     | 926       | 1435      | 0.14                        | -0.26                       | -2.61                       |
| 1003502  | M      | 25  | O     | 3056      | 20.5      | 328      | 94.5      | 1.348     | 967       | 1392      | 0.13                        | -0.27                       | -2.03                       |
| 1015669  | M      | 22  | A     | 3076      | 21.8      | 241      | 106       | 2.350     | 750       | 1978      | 0.17                        | -0.21                       | -2.57                       |
| 1015714  | M      | 20  | B     | 2779      | 17.8      | 133      | 93.8      | 1.344     | 492       | 1259      | 0.17                        | 0.03                        | -1.94                       |
| 1015837  | M      | 19  | B     | 2839      | 21.6      | 30.9     | 116       | 0.996     | 728       | 2352      | 0.18                        | 0.06                        | -2.06                       |
| 1015861  | M      | 21  | A     | 2917      | 22.7      | 222      | 98.0      | 2.424     | 698       | 1586      | 0.14                        | -0.22                       | -2.54                       |
| 1015925  | M      | 22  | A     | 3019      | 21.2      | 173      | 99.1      | 1.512     | 928       | 1320      | 0.15                        | -0.06                       | -2.04                       |
| 1015941  | M      | 22  | O     | 2805      | 20.5      | 118      | 97.3      | 1.848     | 801       | 1473      | 0.14                        | -0.41                       | -1.63                       |
| 101595-  | M      | 21  | O     | 2768      | 18.6      | 63.5     | 92.8      | 1.223     | 875       | 1216      | 0.10                        | -0.07                       | -3.55                       |
| 1015992  | M      | 21  | A     | 1586      | 20.3      | 42.6     | 101       | 0.801     | 352       | 1115      | 0.11                        | -0.03                       | -2.83                       |
| 1019694  | M      | 25  | O     | 2947      | 20.4      | 251      | 94.8      | 0.962     | 761       | 1137      | 0.10                        | -0.18                       | -2.22                       |
| 101990-  | M      | 22  | A     | 3060      | 18.3      | 169      | 103       | 1.653     | 753       | 1542      | 0.13                        | -0.20                       | -1.63                       |
| 1019934  | M      | 19  | A     | 2723      | 23.2      | 260      | 97.2      | 1.621     | 844       | 1540      | 0.09                        | -0.32                       | -1.93                       |
| 1020230  | M      | 20  | O     | 3019      | 22.6      | 149      | 110       | 1.868     | 912       | 1382      |                             | -0.22                       | -1.30                       |
| 1020257  | M      | 21  | B     | 3217      | 20.5      | 88.1     | 98.8      | 1.747     | 883       | 1448      | 0.15                        | -0.24                       | -2.07                       |
| 1020513  | M      | 24  | AB    | 3123      | 21.5      | 155      | 104       | 1.470     | 848       | 1123      | 0.15                        | -0.45                       | -1.53                       |

Table A1 (continued)

TOTAL BLOOD

| sample # | gender | age | group | Na g/L | Mg g/L | K g/L | Ca g/L | Fe g/L | Cu ppb | Zn ppb | $\delta^{66}\text{Zn}$ ‰ | $\delta^{65}\text{Cu}$ ‰ | $\delta^{56}\text{Fe}$ ‰ |
|----------|--------|-----|-------|--------|--------|-------|--------|--------|--------|--------|--------------------------|--------------------------|--------------------------|
| 16843 6  | F      | 32  | A1    | 1814   | 39.7   | 2250  | 65.7   | 497    | 1602   | 5316   | 0.40                     | 0.12                     | -2.39                    |
| 16848 7  | F      | 19  | A     | 2025   | 37.5   | 2306  | 64.5   | 470    | 1306   | 5848   | 0.54                     | -0.52                    | -2.57                    |
| 16849 5  | F      | 20  | O     | 2030   | 51.4   | 2368  | 59.4   | 528    | 870    | 7372   | 0.39                     | 0.22                     | -2.55                    |
| 16888 2  | F      | 20  | B     | 2101   | 35.2   | 2318  | 69.9   | 444    | 1915   | 7778   | 0.53                     | -0.17                    | -2.65                    |
| 16891 1  | F      | 19  | O     | 2068   | 43.3   | 2475  | 60.6   | 511    | 954    | 6889   | 0.45                     | 0.22                     | -2.23                    |
| 16892 -  | F      | 19  | O     | 2341   | 36.3   | 2326  | 66.6   | 488    | 1697   | 7023   | 0.46                     | -0.18                    | -2.82                    |
| 20164 6  | F      | 21  | A     | 2605   | 39.0   | 2288  | 65.9   | 492    | 1523   | 5826   | 0.50                     | 0.01                     | -2.52                    |
| 20165 4  | F      | 20  | O     | 2386   | 37.7   | 2338  | 67.0   | 478    | 792    | 7376   | 0.37                     | 0.17                     | -2.45                    |
| 20166 2  | F      | 20  | B     | 2442   | 37.3   | 2142  | 68.3   | 494    | 1429   | 6991   | 0.41                     | 0.11                     | -2.61                    |
| 20266 5  | F      | 20  | A     | 2616   | 39.4   | 2354  | 71.0   | 458    | 848    | 5848   | 0.25                     | 0.03                     | -2.53                    |
| 20268 1  | F      | 31  | A     | 2388   | 42.2   | 2328  | 63.9   | 494    | 760    | 6245   | 0.46                     | 0.32                     | -2.41                    |
| 22458 1  | F      | 22  | O     | 2425   | 44.2   | 2405  | 67.7   | 490    | 889    | 5564   | 0.45                     | -0.17                    | -2.26                    |
| 22461 0  | F      | 22  | AB    | 1874   | 31.8   | 1911  | 55.4   | 384    | 914    | 6775   | 0.43                     | 0.17                     | -2.52                    |
| 22480 5  | F      | 32  | A     | 1800   | 35.0   | 1994  | 57.8   | 443    | 1282   | 6418   | 0.37                     | -0.04                    | -2.76                    |
| 22495 2  | F      | 34  | A     | 1949   | 33.2   | 2280  | 65.9   | 482    | 1011   | 5750   | 0.36                     | 0.27                     | -3.07                    |
| 22935 8  | F      | 21  | O     | 1946   | 31.3   | 1999  | 62.1   | 425    | 1268   | 4689   | 0.43                     | -0.35                    | -2.69                    |
| 22936 6  | F      | 19  | O     | 1903   | 30.9   | 1926  | 63.1   | 384    | 1530   | 5232   | 0.27                     | -0.01                    | -2.54                    |
| 22939 0  | F      | 22  | A1    | 3760   | 32.6   | 3921  | 61.4   | 860    | 1440   | 5183   | 0.38                     | 0.00                     | -2.39                    |
| 22940 3  | F      | 19  | B     | 1708   | 34.9   | 1899  | 55.0   | 417    | 931    | 5378   | 0.44                     | -0.09                    | -2.85                    |
| 22943 8  | F      | 21  | O     | 1914   | 31.0   | 1970  | 62.4   | 401    | 1040   | 5281   | 0.43                     | 0.15                     | -2.46                    |
| 22946 2  | F      | 20  | A     | 1826   | 33.3   | 2037  | 57.3   | 439    | 1399   | 5167   | 0.34                     | -0.25                    | -2.57                    |
| 23056 -  | F      | 19  | A     | 1854   | 35.8   | 2159  | 59.6   | 423    | 1538   | 5895   | 0.41                     | -0.20                    | -2.56                    |
| 23058 6  | F      | 20  | A     | 1776   | 30.2   | 2026  | 60.4   | 443    | 1079   | 5532   | 0.43                     | 0.17                     | -2.80                    |
| 23060 7  | F      | 20  | A     | 1912   | 34.8   | 2007  | 61.4   | 426    | 1687   | 5489   | 0.61                     | -0.04                    | -2.53                    |
| 23062 3  | F      | 21  | O     | 1594   | 33.7   | 2134  | 52.1   | 471    | 1284   | 5065   | 0.44                     | 0.04                     | -2.57                    |
| 0001935  | M      | 25  | B     | 1595   | 35.0   | 2176  | 50.8   | 492    | 976    | 6697   | 0.32                     | -0.08                    | -2.89                    |
| 0001943  | M      | 35  | O     | 1705   | 33.6   | 2307  | 54.2   | 506    | 779    | 5642   | 0.33                     | 0.11                     | -2.65                    |
| 0175062  | M      | 18  | O     | 1696   | 34.1   | 2163  | 53.9   | 478    | 762    | 5730   | 0.41                     | 0.39                     | -2.81                    |
| 0175089  | M      | 18  | O     | 1718   | 33.5   | 2288  | 55.8   | 456    | 817    | 5565   | 0.58                     | 0.12                     | -2.70                    |
| 0195936  | M      | 35  | B     | 1728   | 40.1   | 2173  | 53.5   | 502    | 932    | 6929   | 0.30                     | 0.21                     | -2.48                    |
| 1003406  | M      | 20  | O     | 1765   | 38.0   | 2375  | 57.5   | 524    | 806    | 7071   | 0.44                     | 0.22                     | -2.73                    |
| 1003430  | M      | 22  | B     | 1696   | 36.1   | 2160  | 53.5   | 519    | 882    | 4909   | 0.40                     | 0.25                     | -3.10                    |
| 1003502  | M      | 25  | O     | 1722   | 41.0   | 2195  | 55.0   | 480    | 892    | 5703   | 0.46                     | 0.11                     | -2.62                    |
| 1015669  | M      | 22  | A     | 1826   | 37.9   | 2139  | 57.7   | 485    | 824    | 6487   | 0.29                     | 0.31                     | -2.73                    |
| 1015714  | M      | 20  | B     | 1722   | 34.9   | 1998  | 56.8   | 447    | 636    | 5171   | 0.33                     | 0.13                     | -2.82                    |
| 1015837  | M      | 19  | B     | 1695   | 34.8   | 2245  | 53.6   | 504    | 825    | 6291   | 0.44                     | 0.43                     | -2.76                    |
| 1015861  | M      | 21  | A     | 1587   | 31.3   | 1922  | 47.4   | 451    | 552    | 5000   | 0.44                     | -0.21                    | -2.98                    |
| 1015925  | M      | 22  | A     | 1415   | 23.2   | 1694  | 41.1   | 324    | 568    | 3608   | 0.37                     | 0.18                     | -2.72                    |
| 1015941  | M      | 22  | O     | 1549   | 31.5   | 1929  | 47.8   | 457    | 626    | 5010   | 0.38                     | 0.13                     | -2.44                    |
| 101595-  | M      | 21  | O     | 1540   | 31.5   | 1771  | 49.6   | 417    | 699    | 5262   | 0.51                     | 0.17                     | -2.66                    |
| 1015992  | M      | 21  | A     | 1534   | 27.7   | 1854  | 47.7   | 414    | 573    | 5287   | 0.27                     | 0.35                     | -2.64                    |
| 1019694  | M      | 25  | O     | 1473   | 31.1   | 1699  | 45.8   | 467    | 638    | 5064   | 0.42                     | 0.18                     | -2.92                    |
| 101990-  | M      | 22  | A     | 1400   | 28.7   | 1661  | 54.9   | 409    | 571    | 5962   | 0.21                     | 0.11                     | -2.53                    |
| 1019934  | M      | 19  | A     | 1484   | 36.5   | 1950  | 48.6   | 451    | 716    | 6386   | 0.63                     | 0.06                     | -2.62                    |
| 1020230  | M      | 20  | O     | 1936   | 43.3   | 2671  | 67.9   | 634    | 913    | 5853   | 0.33                     | 0.28                     | -2.69                    |
| 1020257  | M      | 21  | B     | 1400   | 26.0   | 1433  | 46.5   | 390    | 614    | 4462   | 0.35                     | 0.30                     | -2.80                    |
| 1020513  | M      | 24  | AB    | 1504   | 32.8   | 2034  | 49.0   | 613    | 717    | 7181   | 0.51                     | -0.19                    | -2.90                    |

Table A1 (continued)

ERYTHROCYTES

| sample # | gender | age | group | Na<br>g/L | Mg<br>g/L | K g/L | Ca<br>g/L | Fe<br>g/L | Cu<br>ppb | Zn<br>ppb | $\delta^{66}\text{Zn}$<br>‰ | $\delta^{65}\text{Cu}$<br>‰ | $\delta^{56}\text{Fe}$<br>‰ |
|----------|--------|-----|-------|-----------|-----------|-------|-----------|-----------|-----------|-----------|-----------------------------|-----------------------------|-----------------------------|
| 16843 6  | F      | 32  | A1    | 1077      | 77.1      | 4113  | 23.3      | 1334      | 1016      | 12392     | 0.44                        | 0.40                        | -2.03                       |
| 16848 7  | F      | 19  | A     | 899       | 74.1      | 3849  | 25.5      | 1160      | 962       | 12317     | 0.54                        | 0.08                        | -2.44                       |
| 16849 5  | F      | 20  | O     | 1158      | 97.3      | 3947  | 24.0      | 1003      | 928       | 13925     | 0.48                        | 0.70                        | -2.45                       |
| 16888 2  | F      | 20  | B     | 2010      | 53.1      | 3066  | 51.8      | 972       | 1705      | 12850     | 0.51                        | -0.04                       | -2.54                       |
| 16891 1  | F      | 19  | O     | 1115      | 71.9      | 3814  | 23.6      | 1294      | 1055      | 10298     | 0.38                        | 0.41                        | -2.19                       |
| 16892 -  | F      | 19  | O     | 834       | 68.7      | 3977  | 25.6      | 1184      | 1003      | 14011     | 0.44                        | 0.21                        | -2.54                       |
| 20164 6  | F      | 21  | A     | 1077      | 69.0      | 3952  | 23.8      | 1352      | 982       | 12717     | 0.55                        | 0.60                        | -2.38                       |
| 20165 4  | F      | 20  | O     | 918       | 70.1      | 4409  | 20.3      | 1238      | 890       | 15213     | 0.31                        | 0.73                        | -2.52                       |
| 20166 2  | F      | 20  | B     | 974       | 69.5      | 3312  | 28.0      | 1115      | 1029      | 13466     | 0.35                        | 0.39                        | -2.54                       |
| 20266 5  | F      | 20  | A     | 1039      | 66.8      | 3736  | 28.4      | 1172      | 924       | 12227     | 0.29                        | 0.52                        | -2.47                       |
| 20268 1  | F      | 31  | A     | 1030      | 80.7      | 4096  | 19.5      | 1338      | 863       | 13228     | 0.51                        | 0.65                        | -2.24                       |
| 22458 1  | F      | 22  | O     | 571       | 91.6      | 4047  | 23.1      | 1087      | 802       | 11301     | 0.34                        | 0.31                        | -2.51                       |
| 22461 0  | F      | 22  | AB    | 1147      | 44.7      | 2978  | 24.8      | 834       | 766       | 11506     | 0.35                        | 0.52                        | -2.43                       |
| 22480 5  | F      | 32  | A     | 832       | 47.4      | 3059  | 16.6      | 1067      | 738       | 10815     | 0.39                        | 0.74                        | -2.65                       |
| 22495 2  | F      | 34  | A     | 975       | 40.0      | 2952  | 16.6      | 1047      | 701       | 9600      | 0.45                        | 0.80                        | -2.99                       |
| 22935 8  | F      | 21  | O     | 653       | 47.5      | 3211  | 10.9      | 1018      | 606       | 7971      | 0.61                        | 0.29                        | -2.43                       |
| 22936 6  | F      | 19  | O     | 1211      | 37.9      | 2596  | 25.9      | 826       | 902       | 8410      | 0.46                        | 0.23                        | -2.84                       |
| 22939 0  | F      | 22  | A1    | 901       | 41.0      | 2770  | 18.2      | 925       | 761       | 8524      | 0.40                        | 0.21                        | -2.44                       |
| 22940 3  | F      | 19  | B     | 907       | 53.6      | 3109  | 17.5      | 1013      | 686       | 10213     | 0.49                        | 0.57                        | -2.62                       |
| 22943 8  | F      | 21  | O     | 751       | 44.8      | 3330  | 15.4      | 1007      | 639       | 10097     | 0.55                        | 0.62                        | -2.28                       |
| 22946 2  | F      | 20  | A     | 939       | 45.6      | 3038  | 18.5      | 997       | 809       | 9046      | 0.45                        | 0.16                        | -2.45                       |
| 23056 -  | F      | 19  | A     | 918       | 48.7      | 2987  | 19.9      | 956       | 764       | 10048     | 0.50                        | 0.37                        | -2.52                       |
| 23058 6  | F      | 20  | A     | 928       | 38.3      | 3010  | 18.0      | 979       | 717       | 8848      | 0.55                        | 0.76                        | -2.63                       |
| 23060 7  | F      | 20  | A     | 384       | 26.2      | 1609  | 8.2       | 551       | 381       | 5539      | 0.54                        | 0.45                        | -2.56                       |
| 23062 3  | F      | 21  | O     | 753       | 45.3      | 3116  | 16.0      | 1438      | 667       | 8371      | 0.53                        | 0.69                        | -2.55                       |
| 75828 4  | F      | 28  | B     | 840       | 42.5      | 2229  | 22.9      | 797       | 735       | 9195      |                             | 0.18                        | -2.36                       |
| 78207 3  | F      | 38  | B     | 529       | 37.7      | 1423  | 16.9      | 820       | 541       | 8777      |                             | -0.03                       | -2.15                       |
| 152389 0 | F      | 31  | B     | 658       | 48.9      | 2837  | 18.9      | 818       | 478       | 8372      |                             | 0.49                        | -2.48                       |
| 0001935  | M      | 25  | B     | 706       | 48.3      | 2969  | 14.5      | 938       | 635       | 10628     | 0.48                        | 0.62                        | -3.01                       |
| 0001943  | M      | 35  | O     | 1048      | 44.0      | 2753  | 17.4      | 1015      | 557       | 8791      | 0.48                        | 0.59                        | -2.73                       |
| 0175062  | M      | 18  | O     | 1045      | 48.3      | 2872  | 18.1      | 1033      | 670       | 9354      | 0.41                        | 0.71                        | -2.62                       |
| 0175089  | M      | 18  | O     | 774       | 35.7      | 2311  | 14.6      | 578       | 499       | 6961      | 0.74                        | 0.69                        | -2.84                       |
| 0195936  | M      | 35  | B     | 811       | 58.7      | 2949  | 17.0      | 1050      | 687       | 11632     | 0.45                        | 0.83                        | -2.36                       |
| 1003406  | M      | 20  | O     | 627       | 47.3      | 2223  | 16.0      | 788       | 545       | 8746      | 0.59                        | 0.52                        | -2.74                       |
| 1003430  | M      | 22  | B     | 867       | 59.8      | 2746  | 21.1      | 1026      | 656       | 7702      | 0.56                        | 0.81                        | -3.08                       |
| 1003502  | M      | 25  | O     | 759       | 65.8      | 2604  | 19.9      | 676       | 591       | 9493      | 0.53                        | 0.39                        | -2.63                       |
| 1015669  | M      | 22  | A     | 930       | 56.0      | 2727  | 17.6      | 980       | 653       | 10392     | 0.53                        | 0.83                        | -2.70                       |
| 1015714  | M      | 20  | B     | 840       | 54.3      | 2905  | 17.8      | 962       | 530       | 9248      | 1.25                        | 0.86                        | -2.94                       |
| 1015837  | M      | 19  | B     | 888       | 50.1      | 3114  | 17.7      | 1031      | 716       | 10590     | 0.59                        | 0.82                        | -2.69                       |
| 1015861  | M      | 21  | A     | 881       | 56.9      | 2866  | 21.4      | 872       | 560       | 9393      | 0.20                        | 0.33                        | -3.08                       |
| 1015925  | M      | 22  | A     | 876       | 60.8      | 2848  | 23.2      | 786       | 635       | 7914      | 0.24                        | 0.70                        | -2.59                       |
| 1015941  | M      | 22  | O     | 870       | 56.3      | 2768  | 29.0      | 943       | 713       | 8633      | 0.17                        | 0.70                        | -2.59                       |
| 101595-  | M      | 21  | O     | 954       | 69.1      | 2435  | 23.9      | 869       | 669       | 9619      | 0.34                        | 0.85                        | -2.66                       |
| 1015992  | M      | 21  | A     | 960       | 49.3      | 3185  | 20.6      | 986       | 728       | 9748      | 0.38                        | 0.91                        | -2.75                       |
| 1019694  | M      | 25  | O     | 917       | 53.5      | 2514  | 23.6      | 893       | 670       | 9354      | 0.39                        | 0.66                        | -2.83                       |
| 101990-  | M      | 22  | A     | 854       | 51.5      | 3320  | 19.7      | 933       | 587       | 10923     | 0.27                        | 0.75                        | -2.63                       |
| 1019934  | M      | 19  | A     | 902       | 61.6      | 3128  | 21.8      | 934       | 725       | 10615     | 0.43                        | 0.55                        | -2.74                       |
| 1020230  | M      | 20  | O     | 803       | 53.9      | 2657  | 28.0      | 823       | 761       | 7652      | 0.36                        | 0.70                        | -2.58                       |
| 1020257  | M      | 21  | B     | 676       | 60.3      | 2766  | 18.9      | 890       | 716       | 9463      | 0.32                        | 0.77                        | -2.99                       |
| 1020513  | M      | 24  | AB    | 651       | 53.0      | 3663  | 20.6      | 960       | 752       | 12572     | 0.49                        | 0.23                        | -2.86                       |
